# Supplementary material
Source: publisher figshare collection journal article supplement (https://sage.figshare.com/ndownloader/files/22827083)
Supplement: Supplementary file 1 [file 22827083]

## SUPPLEMENTAL MATERIAL

**eTable 1. Multivariable associations between HDL-c variability and MRI measures (N=535)**

|                                            |         | Beta (95% CI)         | P-value |
|--------------------------------------------|---------|-----------------------|---------|
| <b>Hippocampal volume (mL)</b>             | Model 1 | -1.00 (-2.71, 0.71)   | 0.251   |
|                                            | Model 2 | -0.87 (-2.64, 0.89)   | 0.331   |
| <b>Cerebral blood flow (ml/min/100 ml)</b> | Model 1 | -5.96 (-21.00, 9.08)  | 0.436   |
|                                            | Model 2 | -5.03 (-20.76, 10.69) | 0.529   |
| <b>Log(WMHL)</b>                           | Model 1 | 1.87 (-0.81, 4.54)    | 0.172   |
|                                            | Model 2 | 2.47 (-0.30, 5.24)    | 0.081   |
| <b>Total cerebral volume</b>               | Model 1 | -1.33 (-6.80, 4.14)   | 0.632   |
|                                            | Model 2 | -0.76 (-6.46, 4.94)   | 0.794   |
| <b>Total gray matter volume</b>            | Model 1 | -1.09 (-4.37, 2.22)   | 0.520   |
|                                            | Model 2 | -0.47 (-3.90, 2.96)   | 0.786   |
| <b>Total white matter volume</b>           | Model 1 | -0.26 (-3.97, 3.46)   | 0.893   |
|                                            | Model 2 | -0.28 (-4.17, 3.61)   | 0.887   |

MRI was assessed at month 33±1.4 months. Volumetric measures are presented as percent of intracranial volume, with the exception of hippocampal volume. The unstandardized Beta regression coefficient and p-value were calculated from models using HDL-c variability (mmol/L) as a continuous measure. Log(WMHL) denotes natural-log transformed white matter hyperintensity load. Model 1 is adjusted for age, gender, education, mean HDL cholesterol, slope of HDL cholesterol, and pravastatin use. Model 2 additionally adjusts for BMI, smoking status, alcohol intake, history of diabetes mellitus, natural-log transformed CRP, hypertension, and vascular disease.
